# Supplementary material
Source: Springer Nature journal article supplement (https://www.springermedizin.de/resource/supplementary/12877_2009_186_MOESM1_ESM.pdf/9441364)

# A The *Drosophila* Sex Determination Hierarchy

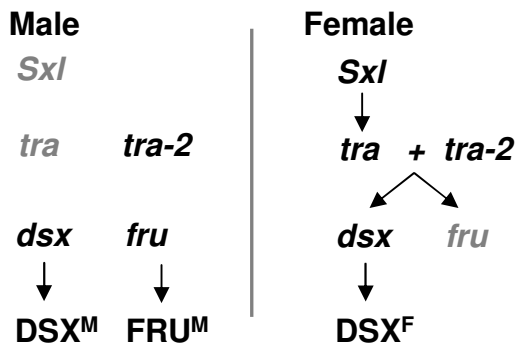

## B

**Control Cross**

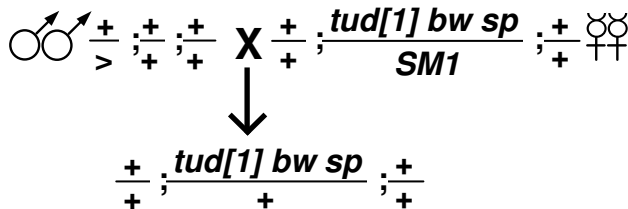

**Experimental Cross**

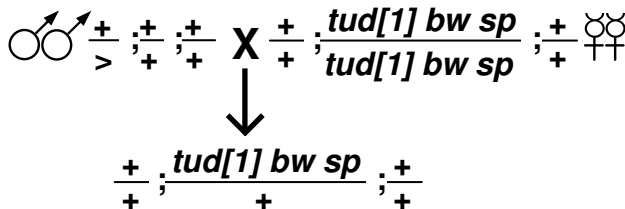

## C

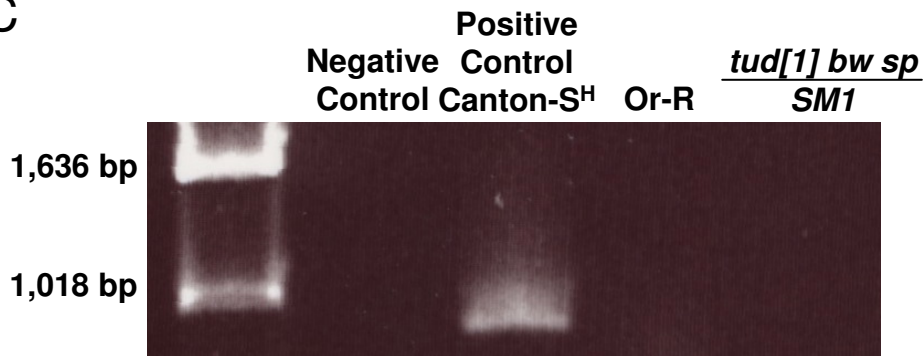

Supplement: MOESM1 [file 9441364]
